# Supplementary material for: Direct deposition of nanoparticulate rhodium–chromium mixed-oxides on a semiconductor powder by band-gap irradiation
Source: Royal Society of Chemistry journal article supplement (doi:10.1039/b808484j), 2008-01-01
Supplement: b808484j.pdf [file b808484j.pdf]

# Direct Deposition of Nanoparticulate Rhodium–Chromium Mixed-Oxide on Semiconductor Powder by Band-Gap Irradiation

*Kazuhiko Maeda,<sup>†,§</sup> Daling Lu,<sup>‡</sup> Kentaro Teramura,<sup>†,#</sup> and Kazunari Domen<sup>\*†</sup>*

<sup>†</sup> Department of Chemical System Engineering, The University of Tokyo, 7-3-1 Hongo, Bunkyo-ku, Tokyo 113-8656, Japan. <sup>‡</sup> Chemical Resources Laboratory, Tokyo Institute of Technology, 4259 Nagatsuta, Midori-ku, Yokohama 226-8503, Japan.

---

<sup>§</sup> Research Fellow of the Japan Society for the Promotion of Science (JSPS).

<sup>#</sup> Present address: Pioneering Research Unit for Next Generation, Kyoto University.

\* To whom corresponding author should be addressed.

Department of Chemical System Engineering, The University of Tokyo,  
7-3-1 Hongo, Bunkyo-ku, Tokyo 113-8656, Japan.

TEL: +81-3-5841-1148, FAX: +81-3-5841-8838, E-mail: [domen@chemsys.t.u-tokyo.ac.jp](mailto:domen@chemsys.t.u-tokyo.ac.jp)

## Experimental Procedures

### *Preparation of Semiconductor Powders*

$(\text{Ga}_{1-x}\text{Zn}_x)(\text{N}_{1-x}\text{O}_x)$  and  $(\text{Zn}_{1+x}\text{Ge})(\text{N}_2\text{O}_x)$  were prepared according to the same manner as reported previously (see refs 23b,c and 24).  $\text{SrTiO}_3$  was prepared by heating a stoichiometric mixture of  $\text{SrCO}_3$  (Kanto Chemicals, 99.9%) and  $\text{TiO}_2$  (Kanto Chemicals, 98.5%, anatase form) powders at 1273 K for 10 h in air.  $\text{Ca}_2\text{Nb}_2\text{O}_7$  was prepared by the polymerized complex method reported by Kakihana et al. (M. Kakihana, M. Milanova, M. Arima, T. Okubo, M. Yashima and M. Yoshimura, *J. Am. Ceram. Soc.*, 1996, **79**, 1673.), as follows. To  $\text{NbCl}_5$  (High Purity Chemicals, 99.9%) dissolved in methanol was added a stoichiometric amount of  $\text{CaCO}_3$  (Kanto Chemicals, 99.5%). After complete dissolution, ethylene glycol (EG) (Kanto Chemicals, 99.5%) and anhydrous citric acid (CA) (Wako Pure Chemicals, 98.0%) were added, and the solution heated overnight at ca. 400 K to promote esterification between EG and CA, yielding a glassy resin. The resin was calcined at ca. 623 K in a mantle heater to complete decomposition to afford a black powder, which was further calcined on an  $\text{Al}_2\text{O}_3$  plate at 923 K for 2 h in air to remove carbon content, and then finally calcined at 1073 K for 2 h in air.  $\beta\text{-Ga}_2\text{O}_3$  (High Purity Chemical, 99.9%) was used without further purification. The crystal structure of the semiconductors was confirmed by X-ray diffraction measurements.

### *Photocatalytic Overall Water Splitting Reactions*

Reactions were carried out in an inner irradiation-type reaction vessel connected to a glass closed gas circulation and evacuation system. The reaction was performed in distilled water (360–400 mL) containing 0.15–0.3 g of the catalyst powder. The reactant solution was first evacuated several times to ensure complete air removal, and then irradiated under a 450 W high-pressure Hg lamp via a quartz ( $\lambda > 200$  nm) or Pyrex ( $\lambda > 300$  nm) tube as a light filter. For visible-light experiments, the Pyrex tube

Supplementary Material (ESI) for Journal of Materials Chemistry  
This journal is (c) The Royal Society of Chemistry 2008

was filled with aqueous 2 M NaNO<sub>2</sub> solution to block ultraviolet light ( $\lambda > 400$  nm). It was confirmed prior to irradiation that no reaction took place in the dark. The evolved gases were analyzed by gas chromatography.

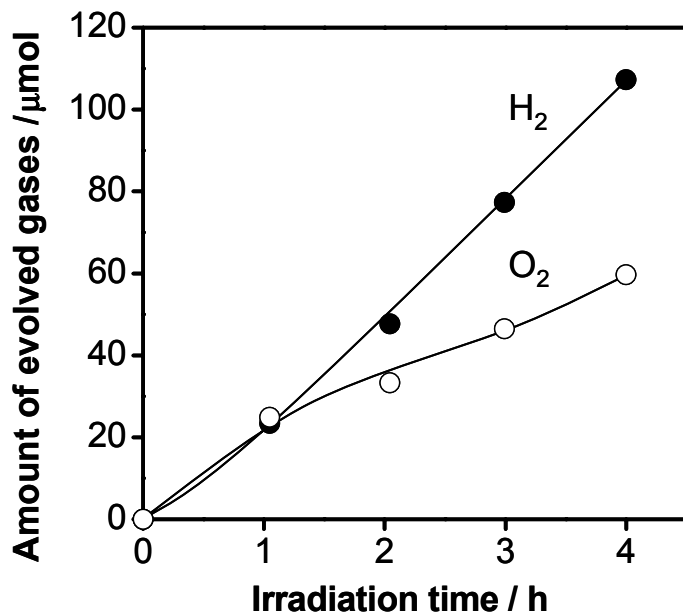

**Figure S1.** A typical time course of H<sub>2</sub> and O<sub>2</sub> evolution using (Ga<sub>1-x</sub>Zn<sub>x</sub>)(N<sub>1-x</sub>O<sub>x</sub>) ( $x = 0.12$ ) from aqueous solution containing (NH<sub>4</sub>)RhCl<sub>6</sub> and K<sub>2</sub>CrO<sub>4</sub> (1 wt % Rh and 1.5 wt % Cr) under visible light irradiation ( $\lambda > 400$  nm).

**Table S1.** Results of TEM-EDS analyses for Rh<sub>2-y</sub>Cr<sub>y</sub>O<sub>3</sub>/(Ga<sub>1-x</sub>Zn<sub>x</sub>)(N<sub>1-x</sub>O<sub>x</sub>)

| Number of samples | Elements / mol.% |      |
|-------------------|------------------|------|
|                   | Rh               | Cr   |
| 1                 | 53.4             | 46.6 |
| 2                 | 43.4             | 56.6 |
| 3                 | 24.4             | 75.6 |
| 4                 | 40.2             | 59.8 |
| 5                 | 37.4             | 62.6 |
| 6                 | 53.9             | 46.1 |
| 7                 | 55.5             | 44.5 |
| 8                 | 66.0             | 34.0 |
| 9                 | 47.8             | 52.2 |
| 10                | 47.4             | 52.6 |

Preparation conditions: 1 wt% Rh and 1.5 wt% Cr; wavelength of incident light,  $\lambda > 400$  nm.
